1 **Young genes to the front - a strategy for future resistance against powdery mildew?**

2

3 Markus Boenn<sup>1,2,3</sup>, François Buscot<sup>2,3</sup>, Marcel Quint<sup>4</sup>, Ivo Grosse<sup>1,3</sup>

4

5 1 Institute of Computer Science, Martin Luther University Halle-Wittenberg, Halle/Saale, Germany

6

7 2 UFZ - Helmholtz Centre for Environmental Research, Dept. Soil Ecology, Theodor-Lieser-Str. 4,

8 06120 Halle/Saale, Germany

9

10 3 German Centre for Integrative Biodiversity Research (iDiv) Halle-Jena-Leipzig, Deutscher Platz

11 5e, 04103 Leipzig, Germany

12

13 4 Institute of Agricultural and Nutritional Sciences, Martin Luther University Halle-Wittenberg,

14 Halle/Saale, Germany

15

16

17 \* Author for Correspondence: Markus Boenn, Institute of Computer Science, Martin Luther

18 University Halle-Wittenberg, Halle (Saale), Germany, markus.boenn.p@gmail.com

19

20

21

22

23

24

25

26 **Abstract**

27 Nonhost resistance of a plant against a microbial pathogen can be the result of a long-lasting  
28 coevolutionary optimization of resource allocation in both host and pathogen. Although this has  
29 been suggested for years, coevolutionary aspects leading to nonhost resistance in plants are not fully  
30 understood yet. Instead, most studies focus on limited subsets of genes which are differentially  
31 expressed in infected plants to describe details of defense strategies and symptoms of diseases.

32

33 Here, we exploit publicly available whole genome gene expression data and combine them with  
34 evolutionary characteristics of genes to uncover a mechanism of host-pathogen coevolution. Our  
35 results suggest that metabolic efficiency in gene regulation is a key aspect leading to nonhost  
36 resistance. In addition, we find that progressing host-pathogen coevolution is accompanied by  
37 subtle, but systematic overexpression of recently founded genes. In support of our plant-specific  
38 data, we observe similar effects in animal species.

39

40

41

42

43 Key words: coevolution, phylotranscriptomics, age index, nonhost resistance, trial and error,  
44 efficiency

45

46

47

48

49

50

## 51 **Introduction**

52 Susceptibility of complex organisms to a small number of host-specific microbial pathogens causes  
53 diseases and, in plants, significant crop failure and yield losses each year [Oerke et al. 2012].  
54 However, in their natural habitats, organisms are exposed to a much broader range of pathogenic  
55 microbes without showing symptoms of disease for the majority of their life cycle. The mechanism  
56 responsible for this phenomenon in plants is called nonhost resistance (NHR), the details of its  
57 mechanism and evolution are not entirely understood yet [Foley et al. 2013].

58

59 NHR is part of the innate immune system of plants. Different from systemic acquired  
60 resistance in plants or the adaptive immune system in vertebrates, NHR is not established for only  
61 some individuals having been exposed to a certain pathogen. Instead, NHR has been inherited from  
62 ancestral plants and affects the entire host plant species [Heath 2000].

63

64 A number of studies investigate the plant innate immune system and NHR (reviewed in  
65 Ausubel [Ausubel 2005], Jones and Dangl [Jones & Dangl 2006] or Bettgenhaeuser et al.  
66 [Bettgenhaeuser et al. 2014], for instance), frequently due to its importance for crop yields.  
67 Accordingly, numerous genes and strategies are known to be involved in NHR, causing interaction-  
68 specific types of resistance.

69

70 Most studies focus on the description of symptoms and the exploration of small subsets of  
71 genes, which are significantly modulated in infected plants. However, as NHR is not learned during  
72 an individual's life cycle, evolutionary characteristics of genes must provide explanations for  
73 presence and absence of NHR. A process describing this phenomenon is the arms race [Hulbert et al.  
74 2001]. In the context of hosts and pathogens, the arms race describes host-pathogen coevolution  
75 [Jones & Dangl 2006] [Bettgenhaeuser et al. 2014] and is, in addition to coevolution of flowers and

76 their pollinators, probably one of the best studied coevolutionary processes of all living organisms,  
77 not only plants.

78

79 Immune responses, including NHR, are energetically costly [Segerstrom 2007]. Typically,  
80 two types of immune response are distinguished: resistance against a pathogen or disease tolerance.  
81 In the latter case, the host focusses on maintainance and repair of the damage caused by the  
82 pathogen in order to survive. As suggested by McNamara and Buchanan [McNamara & Buchanan  
83 2005] as well as Segerstrom [Segerstrom 2007], resources consumed for one of the two tasks are  
84 not available for other tasks.

85

86 Having been established by (co-)evolutionary selection, the interplay of immune response  
87 and maintainance should be highly optimized, i.e. ensure survival and ongoing reproduction of the  
88 host, while staying efficient in terms of minimal utilization of available resources [Beilharz et al.  
89 1993].

90

91 A recently established method to uncover evolutionary trends in entire genomes is  
92 phylostratigraphy [Domazet-Lošo et al. 2007]. Using extensive BLAST searches against sequence  
93 databases comprising reference protein sequences from a large number of species, this approach is  
94 able to assign an approximate evolutionary age to each protein-coding gene of a target organism,  
95 based on sequence homology.

96

97 In a phylotranscriptomic approach, a combination of phylostratigraphy and gene expression  
98 data has been applied to explore various scientific questions, mainly regarding developmental  
99 processes like the developmental hourglass in animals [Domazet-Lošo & Tautz 2010], plants [Quint  
100 et al. 2012] and also in fungi [Cheng et al. 2015]. Here, amount and complexity of data necessiate to

101 sum up the data to a scalar value. The proposed weighted mean, called Transcriptome Age Index  
102 (TAI) [Domazet-Lošo & Tautz 2010], combines gene age and gene expression and is interpreted as  
103 the mean evolutionary age of the transcriptome. A complementary measure incorporating  
104 information about gene divergence instead of age, the Transcriptome Divergence Index (TDI), has  
105 also been proposed [Quint et al. 2012].

106

107 In this work we apply phylotranscriptomic methods to investigate how presence of  
108 resistance (NHR) differs from absence of resistance. We find that NHR is associated with  
109 coevolutionary optimization of the immune response and mainly based on favoured recruitment of  
110 older genes. In contrast to this, we further suggest that the host makes significant use of recently  
111 founded genes to escape from susceptibility for a host-specific pathogen.

112

113

114

## 115 **Material and Methods**

### 116 *Phylostratigraphy*

117 Phylostratigraphy is a method to estimate the phylogenetic age of the entire set of an organisms  
118 genes and is described in detail in [Domazet-Lošo et al. 2007]. For a given target organism,  
119 phylostratigraphy splits the tree of life into age classes, the phylostrata. Phylostrata are identified by  
120 ps1, ps2, ..., psK with psK representing the set of youngest, recently founded, genes and ps1  
121 representing the set of oldest genes, of which domains are conserved in species of all living species.  
122 In this work, phylostrata were selected along the lineage of *Arabidopsis thaliana*, according to the  
123 NCBI taxonomy database, with ps15 being the set of youngest genes.

124

125 Protein-coding genes were assigned to phylostrata using the method of Domazet-Lošo et al.

126 [Domazet-Lošo et al. 2007]. In brief, protein sequences of representative gene models of *A.*  
127 *thaliana* were downloaded from arabidopsis.org (release TAIR10). We used BLAST+ [Camacho et  
128 al. 2009] to perform protein-protein searches against the NCBI-NR database (E-value < 1e-5).  
129 Retrieved sequences were assigned to a phylostratum, according to the Last Common Ancestor  
130 (LCA) of *A. thaliana* and the species the retrieved sequence originates from. Prior to application of  
131 BLAST, sequences originating from viruses and environmental samples were removed from NCBI-  
132 NR database.

133

134 Unless the protein is specific to *A. thaliana*, each query protein has hits in various recent and  
135 distant phylostrata, like Arabidopsis, dicots, or eukaryotes. Each query protein was assigned to the  
136 most distant phylostratum with a BLAST hit. Query proteins without hit were assigned to the  
137 youngest phylostratum ps15.

138

139

140 *Divergence*

141 Estimates of divergence between *A. thaliana* and related species were downloaded from Ensembl-  
142 database via biomaRt-package [Durinck et al. 2005] and have been derived by the codeml-function  
143 of the PAML package [Yang 1997]. These estimates comprise the number of synonymous  
144 substitutions (dS) and nonsynonymous substitutions (dN) per site, of which the ratio dN/dS was  
145 calculated. According to classic evolutionary biology, small dN/dS ratios are indicative of negative  
146 selection, whereas large dN/dS ratios are associated with genes under positive selection. However,  
147 as the absolute dN/dS value is sufficient for the analyses presented here, it is not necessary to test  
148 for specific signatures of selection.

149

150 To allow for better comparison between age of genes (represented by discrete phylostrata)

151 and divergence (represented by continuous values), dN/dS ratios were distributed into 5% quantiles  
152 (discrete representation), where each 5% quantile is a divergence stratum, identified by ds1,  
153 ds2,...,ds20. Here, ds20 represents the set of divergent, fast-evolving, genes and ds1 represents the  
154 set of genes being highly conserved in *A. thaliana* and the reference species. In total, 17651 genes  
155 were considered for the reference species *Arabidopsis lyrata*.

156

157

### 158 *Divergence times*

159 Unless otherwise stated, estimates of divergence times between species related to *A. thaliana* and  
160 geological times covered by phylostrata were taken from the TimeTree database [Hedges et al.  
161 2006].

162

163

### 164 *Microarray data & Filtering*

165 We used previously published microarray data (Affymetrix Arabidopsis ATH1 Genome Arrays)  
166 investigating NHR in *A. thaliana*. In the experiment the authors challenged plants by two fungal  
167 pathogens [Stein et al. 2006]. In the host-specific treatment (H) plants were inoculated with the  
168 powdery mildew *Erysiphe cichoracearum* (synonym for *Golovinomyces cichoracearum*). In the  
169 nonhost-specific treatment (NH) plants were inoculated with the grass mildew *Blumeria graminis*  
170 f.sp. *hordei*; its natural host is barley. Material for four biological replicates per condition (12  
171 samples in total) has been collected from rosettes one day after inoculation. Normalized data was  
172 downloaded from NCBI-GEO database (accession GSE3220).

173

174 From microarray data only probesets of genes present in the current release of TAIR  
175 (TAIR10) were kept. Probesets representing multiple genes were removed. If a gene is represented

176 by multiple probesets (167 genes), expression values of corresponding probesets were summarized  
177 by the arithmetic mean.

178

179 Together, expression values of 20096 genes were considered for further analyses.

180

181

## 182 *Additional datasets*

183 To support findings of the main text, we investigated additional datasets based on microarrays and  
184 RNA-Seq experiments. For a brief description of design, preprocessing and assignment of  
185 phylostrata to genes we refer to Supporting Datasets.

186

187

## 188 *Regulation strength*

189 We applied fold-change (FC) as a typical measure to assess strength and direction of gene  
190 regulation. The FC of each gene was defined as the ratio of mean of raw expression values in  
191 treatment and mean of raw expression values in control.

192

193

## 194 *Regulatome based indices*

195 In analogy to the Transcriptome Age Index (TAI) introduced by Domazet-Lošo and Tautz  
196 [Domazet-Lošo & Tautz 2010] (see Supporting Note), the Regulatome Age Index (RAI) was  
197 obtained by substituting expression values of each condition in the formula for the TAI by FCs  
198 between conditions. The term 'regulatome' describes the set of genes modulated in an experiment  
199 [Ponomarev et al. 2010]. To enable focussing on the direction of modulation, two types of RAI were  
200 defined, one for induction and one for repression.



201

202 For a given comparison c and a set of N genes the RAI for up-regulated (induced) genes was  
203 defined as

$$204 \quad RAI_c^{up} := \frac{\sum_{n=1}^N ps_n fc_n}{\sum_{n'=1}^N fc_{n'}}$$

205 with  $fc_n$  being the FC of gene n. For down-regulated (repressed) genes, the inverted FC was used:

$$206 \quad RAI_c^{down} := \frac{\sum_{n=1}^N ps_n 1/fc_n}{\sum_{n'=1}^N 1/fc_{n'}}$$

207

208 Quint et al. [Quint et al. 2012] introduced a complementary measure, the Transcriptome  
209 Divergence Index (TDI), using information about gene divergence instead of gene age. In analogy  
210 to the TAI-TDI relationship, phylostrata were substituted by divergence strata in the definition of  
211 the RAI. The resulting measure is called Regulatome Divergence Index (RDI). While the RAI  
212 provides information about the mean age of gene regulation, the RDI quantifies selective pressure  
213 on gene regulation, providing information about selective pressure of modulated genes and possible  
214 evolutionary constraints affecting gene regulation.

215

216

### 217 *Comparison of regulation strengths*

218 To compare the two regulation strengths per phylostratum or divergence stratum, we calculated the  
219 difference of  $FC_n^{NH}$  and  $FC_n^H$ , where n is the gene and H and NH are the comparisons. This was  
220 done for each direction of modulation separately. The calculated difference can be rewritten as  
221  $(e_n^{NH} - e_n^H)/e_n^{Co}$ , i.e. the difference between expression values, normalized by the expression in  
222 control conditions. From resulting stratum-wise distributions, we took the median as a

223 representative value.

224

225         Compared to the arithmetic mean, the median has the advantage that it allows for  
226 quantifying interpretations, as it divides the set of genes in two groups of equal size. E.g.,  
227 considering the toy example of gene expression values (1,1,2,2,3,4,4,4,100) we can say that more  
228 'genes' have a value greater than the median ( $m=3$ ), which is not possible for the arithmetic mean  
229 ( $M=13.4$ ) due to the outlier. In the same sense, considering the toy example of differences between  
230 gene expression values (-5,-3.5,-4,-2,-1,7,10) we can say that more 'genes' have a difference greater  
231 than the median ( $m=-2$ ), which is not possible for the arithmetic mean ( $M=0.21$ ).

232

233         Standard errors for each stratum were obtained by applying a two-sample bootstrap  
234 approach within the stratum, given the direction of regulation. In detail, we took a random sample  
235 from pairwise differences between treatment-wise FC (with repetition) and calculate the median.  
236 This procedure was repeated 1000 times. From the resulting distribution of medians, the standard  
237 deviation represents the standard error of the observed median difference between treatments.

238

239

#### 240 *Occupation of metabolic resources*

241 In the absence of an established estimate for metabolic resources used along the entire process of  
242 gene expression, from transcription to translation, we used the transcript concentration, i.e. the  
243 expression value obtained from microarray data, as an approximation.

244

245         Occupation (or release) of resources in treatments with pathogens were estimated by the  
246 difference between the expression value in a treatment and the expression value in uninoculated  
247 samples.

248

249 To assess the amount of expressed transcripts on average, for curves representing host-  
250 specific treatment H a segmented regression approach was applied to fit a line to the steady increase  
251 accross young genes and to find the point where dominance of resource occupation stops. For the  
252 same set of genes a regression line was fitted to the curve representing nonhost-specific treatment.

253

254

### 255 *Availability of data and methods*

256 To perform analyses, the statistical programming language R was used. Routines were summarized  
257 in the R package 'phyintom', currently deposited at <https://sourceforge.net/projects/phyintom/>. The  
258 package comprises the routines as well as manuals and a vignette to reproduce essential findings  
259 presented in the main text of this work.

260

261

262

## 263 **Results**

### 264 *Choice of data*

265 To understand NHR, it is imperative to also understand what happens when plants are not resistant  
266 against a pathogen and are in a stage of coevolutionary optimization. Thus, careful selection of a  
267 dataset with a proper experimental design is critical. We choose the dataset from Stein et al. [Stein  
268 et al. 2006] with a design as depicted in Figure 1a.

269

270 This dataset covers two essential, mutually exclusive treatments. Plants are inoculated with a  
271 host-specific pathogen (H). To compare this state of susceptibility with the opposite state,  
272 resistance, plants are treated with a nonhost-specific pathogen (NH) in an independent experiment.

273 Both treatments are compared to control, i.e. uninoculated, samples (Co).

274

275 Two directions of modulation are considered. Induced genes are stronger expressed in  
276 treatments, compared to the control (Figure 1b). Repressed genes are stronger expressed in control,  
277 compared to the treatment (Figure 1c). The large overlap between comparisons indicates high  
278 agreement of both treatments, considering only the direction but not the strength of modulation.

279

280

281 *Age and divergence correlate with expression and regulation*

282 To determine phylostrata [Domazet-Lošo et al. 2007], protein-coding genes of *A. thaliana* were  
283 assigned to a set of 15 distinct phylostrata (see Table 1), each representing the evolutionary age of a  
284 certain set of genes. According to previous findings [Wolf et al. 2009], we confirm that expression  
285 values of these genes increase with age (Supplementary Figure S1).

286

287 We used the log<sub>2</sub>-transformed fold change (log(FC)) to create a plot in analogy to  
288 Supplementary Figure S1 for gene regulation, shown in Supplementary Figure S2. As the FC  
289 provides information about the direction of the modulation, phylostratum-wise distributions of  
290 transformed FC are shown for induced and repressed genes separately.

291

292 We find that induction of genes systematically decreases with gene age, i.e. the younger the  
293 genes are, the larger is their FC. This is observed for both treatments, but the relationship is stronger  
294 for treatment H. For repressed genes, no systematic dependence on age is visible for treatment H  
295 (see Supplementary Table S1), but for treatment NH. Here, Kendall's rank-based correlation  
296 coefficient indicates stronger repression of young genes.

297

298 It is possible, however, that correlations between age and magnitude of modulation are  
299 artificial. Gene expression data used in this work has been normalized using MAS 5.0 for  
300 Affymetrix microarrays [Stein et al. 2006]. The FC calculated from such data tends to be biased  
301 towards larger values when low transcript concentrations are involved, compared to a FC from high  
302 transcript concentrations [Wu et al. 2004]. Hence, recalling that young genes exhibit low expression  
303 values (Supplementary Figure S1), slopes shown for induced genes are less surprising.

304

305 From a technical point of view, these observations have significant impact on further  
306 analyses. Typically, 1.5- or 2-fold modulation of genes is considered to be meaningful. Applying  
307 these cutoffs to the data (horizontal gray lines in Supplementary Figure S2), a large proportion of  
308 genes assigned to distant (old) phylostrata would be excluded from further analyses.

309

310 To analyse the relationship between expression values and selection pressure on genes as  
311 well, we assigned dN/dS ratios (in the context of this study synonymously used with the term  
312 *sequence conservation*) to 20 divergence strata. According to previous studies [Quint et al. 2012]  
313 [Drost et al. 2015] we confirm that age and sequence conservation exhibit only weak dependence  
314 according to Kendall's rank-based correlation coefficient and Cramer's V (Supplementary Figure  
315 S3), suggesting that they are complementary measures for evolutionary studies.

316

317 We find that gene expression is not independent from sequence conservation  
318 (Supplementary Figure S4). In all conditions, very conserved genes exhibit high expression values.  
319 This is in line with the suggestion of Drummond et al. [Drummond et al. 2005] that highly  
320 expressed genes evolve slowly to avoid cytotoxic protein misfolding.

321

322 In analogy to Supplementary Figure S2, we also explore the relationship between FC and

323 sequence conservation. For treatment with H we find that conserved induced genes (low divergence  
324 strata) exhibit lower FCs, while no dependence on sequence conservation for repressed genes can  
325 be detected (Supplementary Figure S5, Supplementary Table S1). Dependence on sequence  
326 conservation in treatment NH is significantly weaker for induced genes and indicates that  
327 conserved genes exhibit lower FCs. In contrast to this, repression affects conserved genes only  
328 mildly in this comparison.

329

330 Despite the possibility of a bias introduced by microarray normalization, regarding  
331 dependence on age and divergence there are distinct differences between treatments. These  
332 differences are likely to be of biological rather than technical origin. However, based on these  
333 observations we can not apply one of the traditional cutoffs (or any other global cutoff). Instead, we  
334 consider induced genes as genes having  $FC > 1$  and repressed genes as genes having  $FC < 1$ .

335

336

337 *Resistance is achieved efficiently*

338 Induced defenses are accepted as effective strategies of plants to fight against attacks by herbivores  
339 and pathogens [Karban & Myers 1989] [Kessler & Baldwin 2004]. Even more, in terms of  
340 bioenergetics induced strategies for resistance are suggested to be cost-saving as they are not  
341 activated when resistance expression is not required [Karban et al. 1997].

342

343 Hence, following the cost-benefit paradigm, resistance against the nonhost-specific  
344 pathogen NH should be efficient and achieved at minimum usage of resources. In this case the  
345 number of induced genes should be much smaller when the plant is treated with NH than with H.  
346 Otherwise, the plant takes similarly high efforts in presence of H although immune response is  
347 insufficient and ineffective.

348

349 Figure 1b reveals induction of numerous genes in both treatments, contradicting a  
350 constitutive defense strategy. We find that the number of genes induced in the presence of the  
351 nonhost-specific pathogen NH (N=8710, Figure 1b) is significantly smaller than one would expect  
352 by chance (Binomial test,  $P < 2e-16$ ). In contrast to this, the null hypothesis of similar numbers of  
353 induced and repressed genes cannot be rejected when the plant is inoculated with pathogen H  
354 (N=10145,  $P = 0.17$ ). Accordingly, the number of genes induced in NH is significantly smaller than  
355 the number of induced genes in H (McNemar's test,  $P < 2e-16$ ).

356

357 Vice versa, Figure 1c trivially reveals repression of large numbers of genes in presence of  
358 NH. This supports the idea of a cost-saving immune response and is in line with findings of  
359 previous NHR studies, focussing on much smaller sets of genes [Zimmerli et al. 2004] [Stein et al.  
360 2006] [Foley et al. 2013].

361

362

363 *Regulatome based indices reveal a general pattern of NHR*

364 To get a general evolutionary pattern describing NHR in plants, we applied two regulation based  
365 indices, the Regulatome Age Index (RAI) and the Regulatome Divergence Index (RDI). These  
366 indices combine relative gene expression and gene age/conservation and focus on gene induction  
367 and repression. They outperform typical transcriptome based indices like TAI and TDI under  
368 several aspects (see Supporting Note).

369

370 Both directions of modulation were taken into account. Accordingly, Figure 2 shows results  
371 for  $RAI^{up}$  and  $RAI^{down}$  as well as  $RDI^{up}$  and  $RDI^{down}$ . Considering gene induction, we find that  
372 modulated genes are less susceptible to evolutionary changes in treatment NH (red lines). Here,

373 induction affects most notably older genes and genes under weak selection (low values of RAI and  
374 RDI, respectively), compared to treatments with the host-specific fungus H. Vice versa, repression  
375 affects older genes and genes with high dN/dS ratios when the plant is inoculated with H.  
376 Reliability of observed differences between comparisons is indicated by standard errors and  
377 confirmed for the RAI by a z-test ( $P < 0.01$  for induction as well as for repression). For the RDI,  
378 differences between comparisons are not significant ( $RDI^{up}$ ,  $P < 0.11$ ) or only weakly significant  
379 ( $RDI^{down}$ ,  $P < 0.05$ ), respectively.

380

381 For a fair comparison with the TAI, the RAI was calculated across all genes. However,  
382 considering subsets of genes is more intuitive. Accordingly, Supplementary Figure S6 shows RAI  
383 profiles for (1) taking into account only all induced genes (10139 for H, 8714 for NH), (2) 6906  
384 commonly induced genes, as well as (3) genes which are exclusively induced in each treatment  
385 (3229 for H, 1808 for NH) and harbour genes which are very specific to the corresponding type of  
386 interaction. For repressed genes RAI values are calculated for analogous subsets.

387

388 Although the dominating shape of the 'full' RAI profile is not changed in any case,  
389 consideration of subsets of genes clearly increases significance of observed differences in cases (1)  
390 and (3). However, reliability of indicated differences between comparisons in case (2) is weak, in  
391 particular for commonly repressed genes. Together, Supplementary Figure S6 indicates that the  
392 NHR pattern is mainly caused by the relatively small number of genes which are highly specific to  
393 the type of interaction, being modulated to the opposite direction in the other treatment (see Figure  
394 1).

395

396

397 *Regulation strengths of commonly modulated genes*



398 Although observed differences between treatments are not significant in RAI profiles, due to their  
399 sizes sets of commonly modulated genes are likely to harbour not only noise, but genes being  
400 relevant for both types of treatments. As immune responses can be expected to be induced, we focus  
401 on commonly induced genes first.

402

403 We want to investigate, if specific phylostrata ranges are responsible for the shape of the  
404 RAI profile. For this, we calculated gene-wise differences of regulation strengths as expressed by  
405 FCs. From the resulting distribution we take the median as a representative value. This is done for  
406 each phylostratum. The median allows to draw conclusions about the number of genes exhibiting  
407 higher or lower induction in one of the treatments, hence combining number of induced genes and  
408 strength of induction. Medians are greater than zero, when modulation is stronger and affects more  
409 genes in the nonhost-specific treatment. Otherwise, medians are less than zero.

410

411 NHR is complex due to the involvement of numerous pathways [Gill et al. 2015], requiring  
412 strict control of gene expression by likewise complex regulatory mechanisms, which are most  
413 notably observed for old genes [Warnefors & Eyre-Walker 2011]. Accordingly, Figure 3a reveals  
414 that strength of induction is systematically higher for old genes when considering plants treated  
415 with NH. By construction of phylostrata [Domazet-Lošo et al. 2007], functions of expression  
416 products of these genes tend to base on evolutionarily optimized domains without significant  
417 modifications since their first appearance. In contrast to this, plants treated with the host-specific  
418 pathogen H systematically exhibit stronger induction of younger, recently founded genes. Together,  
419 this results in a sigmoidal arrangement of phylostratum-wise medians.

420

421 Applying the same procedure to divergence strata as well (Figure 3b) reveals weak evidence  
422 that genes under strongest selective pressure are stronger induced in treatment H, while conserved

423 genes tend to be stronger induced in NH.

424

425           Supplementary Figure S7 reveals that most commonly repressed genes are stronger  
426 repressed in presence of NH, no matter the stratum.

427

428

429 *Systematic induction of young genes*

430 Results obtained so far were derived from FCs (Figure 2) and differences between FCs (Figure 3).

431 They suggest treatment-specific favour of age ranges regarding strength and direction of modulation  
432 by condensing data or consideration of a large subset of genes.

433

434           However, the FC provides information about relative changes in transcript concentrations.

435 Hence, it is unable to distinguish between inductions from, e.g., 1 to 10 and 100 to 1000 transcripts  
436 (10-fold in both cases). To further understand how absolute changes in transcript concentrations  
437 affect NHR, we next consider absolute differences between transcript concentrations of control and  
438 treatment groups.

439

440           Using absolute differences has the advantage that also information in terms of occupation of  
441 resources is provided; in this case numbers of transcripts serve as an approximation for resources.

442

443           For a comprehensive view on the data, genes were sorted according to their phylostratum,  
444 young genes first. Within each phylostratum, genes were sorted by transcript concentration in  
445 control conditions, lowest values first. Then, differences between treatment and control were  
446 cumulatively added to each other, accross all genes, beginning with young genes. This is motivated  
447 by the finding that large numbers of young genes exhibit distinct and treatment-specific behaviour,

448 as they are strongest induced in H (Figure 3). When values increase, induction is indicated.  
449 Otherwise, genes are repressed. To focus on young genes, curves covering recent phylostrata are  
450 shown in Figure 4. Curves for the entire dataset are given in Supplementary Figure S8.

451

452 While results obtained so far suggest that numerous young genes are stronger induced in H,  
453 the immediate and steady increase of the orange curve in Figure 4 suggests that in fact all young  
454 genes either (i) are induced in H or (ii) do not experience significant repression. Extending the  
455 conclusion that young genes are stronger induced in H (Figure 3), this systematic induction not only  
456 comprises younger phylostrata ps15 to ps11, covering 1190 genes, but reaches back even to the  
457 evolutionarily old phylostratum ps5 (Embryophyta), covering 7324 genes in total (36.4% of all  
458 genes). Indeed, 3872 young genes in these phylostrata exhibit a  $FC > 1$ .

459

460 To get an impression of the number of transcripts added by each gene, a regression line was  
461 fitted to the curve for genes contained in ps15 to ps5. We find that, on average and compared to the  
462 control, gene expression increases by nine (rounded from slope=9.08,  $R^2=0.86$ ) transcripts per gene  
463 in H.

464

465 In contrast to this, the slope of the curve representing NH for the same range of phylostrata  
466 points to the opposite direction, revealing that gene expression decreases by five ( $-4.87$ ,  $R^2=0.41$ )  
467 transcripts per gene. Indeed, only 2854 young genes exhibit a  $FC > 1$ .

468

469 From these observations we extract two pieces of information. First, young genes are less  
470 likely to play important roles in an induced immune response against NH. Second, in a cell with  
471 limited resources (in terms of free nucleotides, for instance), compared to control conditions young  
472 genes release resources, which are likely reallocated to increase expression of old genes.

473

474       The curves furthermore suggest that very highly expressed genes (located at right borders of  
475 phylostrata) are repressed in each treatment. This is, however, an artifact caused by the arrangement  
476 of data points. Genes exhibiting a very high expression value in control condition are outliers in the  
477 corresponding stratum and are likely to exhibit a much smaller expression value in any treatment.  
478 This consistently results in systematic drops at the end of each stratum.

479

480       To confirm that this does not affect our findings significantly, we recreate Figure 4 without  
481 sorting genes according to their transcript concentration. Instead, within each phylostratum genes  
482 are randomly permuted, followed by computation of the cumulative curve. This procedure is  
483 repeated ten times and the mean cumulative curve is considered (Supplementary Figure S9). We  
484 find that young genes still exhibit an immediate and steady increase in H, which is not visible for  
485 NH.

486

487       However, the slope stops at the slightly younger phylostratum ps6 (Tracheophyta). This also  
488 affects the number of transcripts expressed on average, now being about 14 for H, with  $R^2 > 0.95$ .  
489 Permutation also affects the curve representing NH. Here, the negative trend is increased, i.e. more  
490 negative, resulting in about ten transcripts for which no resources in terms of free nucleotides or  
491 ribosomes have to be occupied ( $R^2 > 0.85$ ).

492

493       We applied the same analyses for divergence strata as well (Figure 4 and Supplementary  
494 Figure S8). We find that treatment with NH results in immediate and steady decrease of the curve,  
495 indicating that significant repression of genes dominates this treatment. In contrast to this, the 50 %  
496 of genes being under lowest negative selection (meaning dN/dS close to one) are dominated by  
497 induction, when the host-specific treatment is considered. This is indicated by the curve for H,

498 which is located above the zero line for divergence strata ds20-ds11. For the remaining 50 % of  
499 genes being more conserved, repression dominates. Again, this general impression does not change  
500 by permutation and averaging (Supplementary Figure S10).

501

502

### 503 *Additonal datasets*

504 Application of the same approach to a second NHR experiment (again *A. thaliana* challenged with  
505 H and NH fungi, see Supporting Datasets for details) confirmed most patterns derived for the  
506 experiment of Stein et al. [Stein et al. 2006] (see Supplementary Figure 11 and 12). However,  
507 dataset-specific differences are visible. E.g. the NHR pattern derived by the RAI is not significant.  
508 For commonly induced genes, consideration of divergence strata reveals that more weakly  
509 conserved genes are involved in interaction with H. Furthermore, systematic resource occupation  
510 does not affect fast-evolving genes in H, but in NH.

511

512 We also investigated a dataset dealing with rice as well as datasets dealing with animal  
513 hosts, which are designed in a fashion that is comparable to Figure 1a (see Supporting Datasets for  
514 details). For this, again we assigned genes to phylostrata using the method introduced by Domazet-  
515 Lošo et al. [Domazet-Lošo et al. 2007]. Numbers of genes per phylostratum can be found in  
516 Supplementary Table S2. Next, we computed the RAI and accumulated transcript concentrations for  
517 each species. Considering Supplementary Figure 13 to 16, we find that in treatment H young genes  
518 accumulate transcripts in these datasets as well, mirroring the findings of Figure 4. However, the  
519 general NHR pattern exhibited by the RAI for *A. thaliana* (Figure 2) is visible in only some cases.  
520 Interestingly, in particular the NHR pattern is not visible when considering mice (Supplementary  
521 Figure 15 and 16), which rely on both innate and an evolutionarily much younger acquired immune  
522 system [Zhu et al. 2013].

523

524

525

526 **Discussion**

527 Applying phylotranscriptomic methods, we have observed a systematic activation of thousands of  
528 young genes during a compatible interaction between a host and a microbial pathogen H. Moreover,  
529 we observed that this activation is specific to the compatible interaction. In contrast to this, during  
530 an incompatible interaction (NH) recruitment of old genes is favoured.

531

532 We presume that activation of thousands of young genes is a sophisticated coevolutionary  
533 strategy of the host and a key element of the arms race. Here, functions of induced young genes,  
534 which, by construction of phylostrata [Domazet-Lošo et al. 2007], harbour previously not  
535 established domains, are combined with functions of induced old genes. This might generate new  
536 ways for detection of microbial effectors and proper responses, lowering susceptibility for the  
537 pathogen.

538

539 However, as complex regulatory mechanisms are rare for young genes [Warnefors & Eyre-  
540 Walker 2011], a directed activation of large amounts of young genes appears to be unlikely. Instead,  
541 from our point of view the results propose an undirected and trial-and-error-based strategy (TES) of  
542 the host.

543

544 Young genes are usually short and consist of a low number of exons. This has been found  
545 for animals by Neme and Tautz [Neme & Tautz 2013] and can be confirmed for *A. thaliana*  
546 (Supplementary Figure S17 and S18). Further, their regulation requires fewer transcription factors  
547 and they harbour lower numbers of other regulatory and structural elements [Warnefors & Eyre-

548 Walker 2011]. These characteristics of young genes indicate rapid transcription and post-  
549 transcriptional processing. Subsequently, initiation and elongation during translation of short genes  
550 tend to be faster [Ding et al. 2012]. Hence, irrespective of their originally intended biological  
551 function, expression products of young genes are rapidly available for the immune response.

552

553 In addition to this and in line with the argumentation of Drummond et al. [Drummond et al.  
554 2005], undirected induction of young genes is less risky than undirected induction of old genes,  
555 which is a further benefit. As recently founded genes tend not to be involved in complex regulatory  
556 pathways [Warnefors & Eyre-Walker 2011], their induction is rarely expected to accidentally have  
557 negative impacts on well established and essential pathways controlling growth and metabolism, for  
558 instance.

559

560 On the other hand, the systematic induction of thousands of young genes is a metabolic  
561 challenge. The biosynthesis of nine transcripts and proteins on average occupies significant  
562 amounts of resources, ranging from free nucleotides and RNA polymerases for transcription to free  
563 ribosomes and t-RNAs for translation. As resources in cells are limited and genes are competing for  
564 them [Brewster et al. 2014], they have to be reallocated towards younger genes. Vice versa, when  
565 used for this task, they cannot be used for other tasks [Segerstrom 2007] [McNamara & Buchanan  
566 2005], e.g. expression of old genes. Hence, the observed slightly lower induction of old genes  
567 (Figure 3) might, at least in part, be a consequence of the systematic induction of young genes.

568

569 An obvious contradiction in this scenario is that the host induces young genes at the cost of  
570 old genes, potentially lowering the effectiveness of the part of the immune response against H,  
571 which is based on old genes. However, tolerating disease by an only partially efficient immune  
572 response can be sufficient to survive pathogen attack and has been suggested to increase fitness of

573 the host [Rauw 2012]. At the coevolutionary stage of susceptibility the host is lacking mechanisms  
574 to detect and respond to all effectors elicited into the cell by the pathogen. Hence, with an alternating  
575 arms race in mind, we suggest that the TES is an investment into future defense strategies and is to  
576 be preferred over investment of too many resources for an unpromising defense response.

577

578 We analyzed datasets from additional independent studies involving compatible interactions  
579 (like H) and incompatible interactions (like NH) to confirm the presence of a TES. Here, we took  
580 into account a second dataset dealing with the host *A. thaliana*, and datasets dealing with *Oryza*  
581 *sativa* and the animal hosts *Mus musculus* and *Caenorhabditis elegans*.

582

583 Beside the diversity of hosts representing two eukaryotic kingdoms, setups of these  
584 experiments are highly heterogenic regarding the utilized high-throughput platform (microarrays  
585 and RNA-Seq) and preprocessing of data as well as types of pathogens (bacterial, eukaryotic and  
586 viral) used.

587

588 Surprisingly, although these and other differences usually result in lower comparability  
589 between experiments and agreement in their outcomes [Ingersoll et al. 2010] [Wang et al. 2014]  
590 [Maboreke et al. 2016], we repeatedly find that curves representing H exhibit a steeper positive  
591 slope across significant amounts of young genes, compared to curves representing NH.

592

593 This similar overall logic of the immune response supplements other examples of  
594 convergent evolution towards similar components of the immune systems of plants and animals  
595 [Ausubel 2005], indicating a re-invention of the same idea to overcome susceptibility for a  
596 challenging pathogen.

597



598            Important questions remain as to how the host initiates and controls the undirected  
599 expression of young genes during a TES. Phylotranscriptomic methods provide the opportunity to  
600 apply powerful analyses to address these questions, provided the availability or generation of proper  
601 datasets.

602

603

604

## 605 **Conclusions**

606 In this phylotranscriptomic study we explored publicly available data and propose that successful  
607 resistance of a plant against a nonhost-specific pathogen is caused by efficient use of old genes,  
608 indicating that NHR is less susceptible to evolutionary changes. We uncovered a potential approach  
609 how coevolution between pathogens and hosts works and found hints that this mechanism is also  
610 established in animals, indicating a re-invention of the same idea across eukaryotic kingdoms.

611

612            In this work we analysed data of the host. However, it is possible, that microbial pathogens  
613 similarly rely on induction of recently founded genes to overcome defense strategies of the host.  
614 This will be subject of further investigations.

615

616            Taken together, our results supplement currently existing knowledge about evolutionary  
617 aspects of NHR and coevolution of hosts and pathogens.

618

619

## 620 **Acknowledgments**

621 We thank Robert Paxton for helpful comments on animal hosts. This work was partially supported  
622 by a Flexible Pool Grant (number 50170649\_#20) of the German Centre for Integrative

623 Biodiversity Research (iDiv) Halle – Jena – Leipzig.

624

625

## 626 References

627 **Ausubel, F. M. (2005).** *Are innate immune signaling pathways in plants and animals conserved?*,  
628 *Nat. Immunol.* 6 : 973-979.

629 **Beilharz, R. G.; Luxford, B. G. and Wilkinson, J. L. (1993).** *Quantitative genetics and*  
630 *evolution: Is our understanding of genetics sufficient to explain evolution?*, *J. Anim. Breed. Genet.*  
631 110 : 161-170.

632 **Bettgenhaeuser, J.; Gilbert, B.; Ayliffe, M. and Moscou, M. J. (2014).** *Nonhost resistance to rust*  
633 *pathogens - a continuation of continua.*, *Front Plant Sci* 5 : 664.

634 **Brewster, R. et al. (2014).** *The Transcription Factor Titration Effect Dictates Level of Gene*  
635 *Expression*, *Cell* 156 : 1312 - 1323.

636 **Camacho, C. et al. (2009).** *BLAST+: architecture and applications.*, *BMC Bioinformatics* 10 : 421.

637 **Cheng, X.; Hui, J. H. L.; Lee, Y. Y.; Wan Law, P. T. and Kwan, H. S. (2015).** *A “Developmental*  
638 *Hourglass” in Fungi*, *Molecular Biology and Evolution* 32 : 1556.

639 **Ding, Y.; Shah, P. and Plotkin, J. B. (2012).** *Weak 5'-mRNA secondary structures in short*  
640 *eukaryotic genes.*, *Genome Biol Evol* 4 : 1046-1053.

641 **Domazet-Lošo, T.; Brajković, J. and Tautz, D. (2007).** *A phylostratigraphy approach to uncover*  
642 *the genomic history of major adaptations in metazoan lineages.*, *Trends Genet.* 23 : 533-539.

643 **Domazet-Lošo, T. and Tautz, D. (2010).** *A phylogenetically based transcriptome age index*  
644 *mirrors ontogenetic divergence patterns.*, *Nature* 468 : 815-818.

645 **Drost, H.-G.; Gabel, A.; Grosse, I. and Quint, M. (2015).** *Evidence for active maintenance of*  
646 *phylotranscriptomic hourglass patterns in animal and plant embryogenesis.*, *Mol. Biol. Evol.* 32 :  
647 1221-1231.

648 **Drummond, D. A.; Bloom, J. D.; Adami, C.; Wilke, C. O. and Arnold, F. H. (2005).** *Why highly*  
649 *expressed proteins evolve slowly.*, *Proc. Natl. Acad. Sci. U.S.A.* 102 : 14338-14343.

650 **Durinck, S. et al. (2005).** *BioMart and Bioconductor: a powerful link between biological*  
651 *databases and microarray data analysis.*, *Bioinformatics* 21 : 3439-3440.

652 **Foley, R. C.; Gleason, C. A.; Anderson, J. P.; Hamann, T. and Singh, K. B. (2013).** *Genetic and*  
653 *genomic analysis of *Rhizoctonia solani* interactions with *Arabidopsis*; evidence of resistance*  
654 *mediated through NADPH oxidases.*, *PLoS ONE* 8 : e56814.

655 **Gill, U. S.; Lee, S. and Mysore, K. S. (2015).** *Host versus nonhost resistance: distinct wars with*  
656 *similar arsenals.*, *Phytopathology* 105 : 580-587.

657 **Heath, M. C. (2000).** *Nonhost resistance and nonspecific plant defenses.*, *Curr. Opin. Plant Biol.* 3 :  
658 315-319.

659 **Hedges, S. B.; Dudley, J. and Kumar, S. (2006).** *TimeTree: a public knowledge-base of*  
660 *divergence times among organisms.*, *Bioinformatics* 22 : 2971-2972.

661 **Hulbert, S. H.; Webb, C. A.; Smith, S. M. and Sun, Q. (2001).** *Resistance gene complexes:*

- 662 *evolution and utilization.*, Annu Rev Phytopathol 39 : 285-312.
- 663 **Ingersoll, M. A. et al. (2010).** *Comparison of gene expression profiles between human and mouse*  
664 *monocyte subsets*, Blood 115 : e10-e19.
- 665 **Jones, J. D. G. and Dangl, J. L. (2006).** *The plant immune system.*, Nature 444 : 323-329.
- 666 **Karban, R.; Agrawal, A. A. and Mangel, M. (1997).** *The benefits of induced defenses against*  
667 *herbivores*, Ecology 78 : 1351-1355.
- 668 **Karban, R. and Myers, J. H. (1989).** *Induced plant responses to herbivory*, Annual Review of  
669 Ecology and Systematics : 331-348.
- 670 **Kessler, A. and Baldwin, I. T. (2004).** *Herbivore-induced plant vaccination. Part I. The*  
671 *orchestration of plant defenses in nature and their fitness consequences in the wild tobacco*  
672 *Nicotiana attenuata.*, Plant J. 38 : 639-649.
- 673 **Maboreke, H. R. et al. (2016).** *Transcriptome analysis in oak uncovers a strong impact of*  
674 *endogenous rhythmic growth on the interaction with plant-parasitic nematodes.*, BMC Genomics  
675 17 : 627.
- 676 **McNamara, J. and Buchanan, K. (2005).** *Stress, resource allocation, and mortality*, Behavioral  
677 Ecology 16 : 1008-1017.
- 678 **Neme, R. and Tautz, D. (2013).** *Phylogenetic patterns of emergence of new genes support a model*  
679 *of frequent de novo evolution.*, BMC Genomics 14 : 117.
- 680 Oerke, E.-C.; Dehne, H.-W.; Schönbeck, F. and Weber, A., 2012. *Crop production and crop*  
681 *protection: estimated losses in major food and cash crops.* Elsevier, .
- 682 **Ponomarev, I.; Rau, V.; Eger, E. I.; Harris, R. A. and Fanselow, M. S. (2010).** *Amygdala*  
683 *transcriptome and cellular mechanisms underlying stress-enhanced fear learning in a rat model of*  
684 *posttraumatic stress disorder.*, Neuropsychopharmacology 35 : 1402-1411.
- 685 **Quint, M. et al. (2012).** *A transcriptomic hourglass in plant embryogenesis.*, Nature 490 : 98-9101.
- 686 **Rauw, W. M. (2012).** *Immune response from a resource allocation perspective.*, Front Genet 3 :  
687 267.
- 688 **Seegerstrom, S. C. (2007).** *Stress, Energy, and Immunity: An Ecological View.*, Curr Dir Psychol Sci  
689 16 : 326-330.
- 690 **Stein, M. et al. (2006).** *Arabidopsis PEN3/PDR8, an ATP binding cassette transporter, contributes*  
691 *to nonhost resistance to inappropriate pathogens that enter by direct penetration.*, Plant Cell 18 :  
692 731-746.
- 693 **Wang, C. et al. (2014).** *The concordance between RNA-seq and microarray data depends on*  
694 *chemical treatment and transcript abundance*, Nature biotechnology 32 : 926-932.
- 695 **Warnefors, M. and Eyre-Walker, A. (2011).** *The accumulation of gene regulation through time.*,  
696 Genome Biol Evol 3 : 667-673.
- 697 **Wolf, Y. I.; Novichkov, P. S.; Karev, G. P.; Koonin, E. V. and Lipman, D. J. (2009).** *The*  
698 *universal distribution of evolutionary rates of genes and distinct characteristics of eukaryotic genes*  
699 *of different apparent ages.*, Proc. Natl. Acad. Sci. U.S.A. 106 : 7273-7280.
- 700 **Wu, Z.; Irizarry, R. A.; Gentleman, R.; Martinez-Murillo, F. and Spencer, F. (2004).** *A model-*  
701 *based background adjustment for oligonucleotide expression arrays*, Journal of the American  
702 statistical Association 99 : 909-917.
- 703 **Yang, Z. (1997).** *PAML: a program package for phylogenetic analysis by maximum likelihood.*,

704 Comput. Appl. Biosci. 13 : 555-556.

705 **Zhu, M. et al. (2013).** *A Silurian placoderm with osteichthyan-like marginal jaw bones.*, Nature  
706 502 : 188-193.

707 **Zimmerli, L.; Stein, M.; Lipka, V.; Schulze-Lefert, P. and Somerville, S. (2004).** *Host and non-*  
708 *host pathogens elicit different jasmonate/ethylene responses in Arabidopsis.*, Plant J. 40 : 633-646.

709

710

711

712

713

714

715

716

717

718

719

720

721

722

723

724

725

726

727

728

729

730

731

732 **Table 1:** Phylostrata along the lineage of *A. thaliana*

| ps | taxon                       | genes |
|----|-----------------------------|-------|
| 15 | <i>Arabidopsis thaliana</i> | 393   |
| 14 | <i>Arabidopsis</i>          | 119   |
| 13 | Camelineae                  | 119   |
| 12 | Brassicales                 | 310   |
| 11 | rosids                      | 249   |
| 10 | dicots                      | 398   |
| 9  | Mesangiospermae             | 566   |
| 8  | Magnoliophyta               | 695   |
| 7  | Spermatophyta               | 432   |
| 6  | Tracheophyta                | 699   |
| 5  | Embryophyta                 | 3344  |
| 4  | Streptophyta                | 228   |
| 3  | Chlorobionta                | 647   |
| 2  | eukaryotes                  | 5996  |
| 1  | cellular organisms          | 5901  |
|    | total                       | 20096 |

733

734

735

736

737

738

739

740

741

742

743

744

745 **Figure legends**

746

747 **Fig. 1** Design of the study. (a): The NHR-experiment considers three groups: an uninoculated  
748 control (Co), a group with plants challenged by the host-specific pathogen (H) and a group with  
749 plants challenged by a non-host-specific pathogen (NH), which is not compatible to the plant under  
750 investigation, but to plants from more distant phyla. (b) and (c): The two treatments are compared to  
751 the control group. Genes are considered induced if the fold-change is greater than one (b). Genes  
752 are considered repressed if the fold-change is less than one (c). Seven genes exhibit a fold-change  
753 of exactly one in the comparison with treatment NH. To ensure that numbers of genes sum up to  
754 20096, they are included in the sets regarding modulation in treatment H.

755

756 **Fig. 2** Regulatome Age Index (RAI) and Regulatome Divergence Index (RDI) for the data.  
757 Subfigures (a) and (b) represent RAI and RDI, respectively. The RDI is given for the related species  
758 *Arabidopsis lyrata*. Measures distinguish between the two directions of modulation, RAI<sup>up</sup> (or  
759 RDI<sup>up</sup>) and RAI<sup>down</sup> (or RDI<sup>down</sup>) for induction and repression of genes, respectively.

760

761 **Fig. 3** Comparison of commonly induced genes. Medians of pairwise differences of genes in each  
762 phylostratum and divergence stratum are shown for commonly induced genes. Horizontal zero lines  
763 determine whether regulation in treatment NH (points are above line), or treatment H (points are  
764 below line) is stronger. Strata comprising young or fast-evolving genes, respectively, are located on  
765 the left. Vertical gray lines separate points at right-most stratum having points below zero line,  
766 allowing for a single outlier. Stars indicate significance of enrichment of points below zero line  
767 (Fisher's test, \*: P<0.05, \*\*\*: P<0.001).

768

769

770 **Fig. 4** Accumulation of transcript expression accross genes. Figure shows cumulative curves of  
771 differences between expression levels in control and treatment groups. For this, genes are ordered  
772 by their phylostratum (or divergence stratum), so that young (divergent) genes are on the left and  
773 old (conserved) genes are on the right. Borders between strata are given by vertical lines. Within  
774 each stratum, genes were sorted according to their expression value in uninoculated plants (lowest  
775 first). Each point corresponds to a gene. Curves are given for comparison with host-specific  
776 treatment H (orange points) and nonhost-specific treatment NH (green points). When genes are  
777 induced or repressed, the curve increases or decreases, respectively. Curves are given for youngest  
778 (most divergent) genes only.

779

### phylostratum

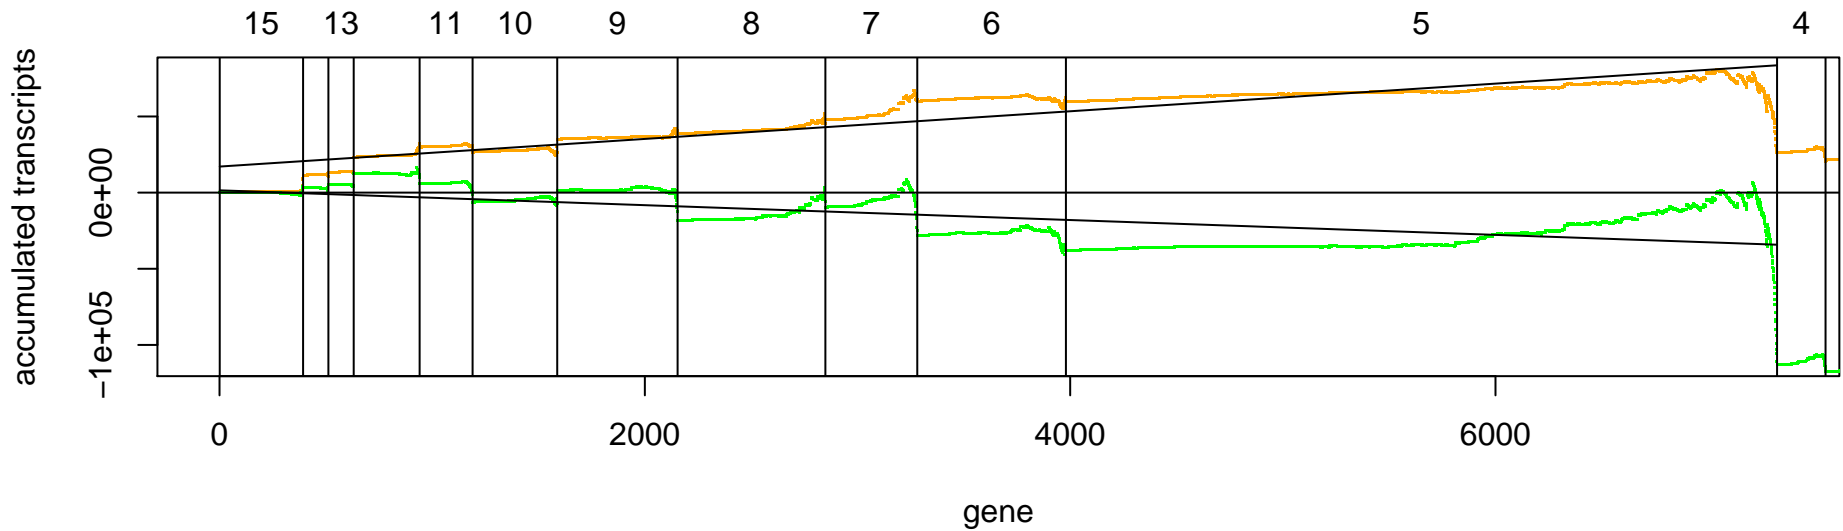

### divergence stratum

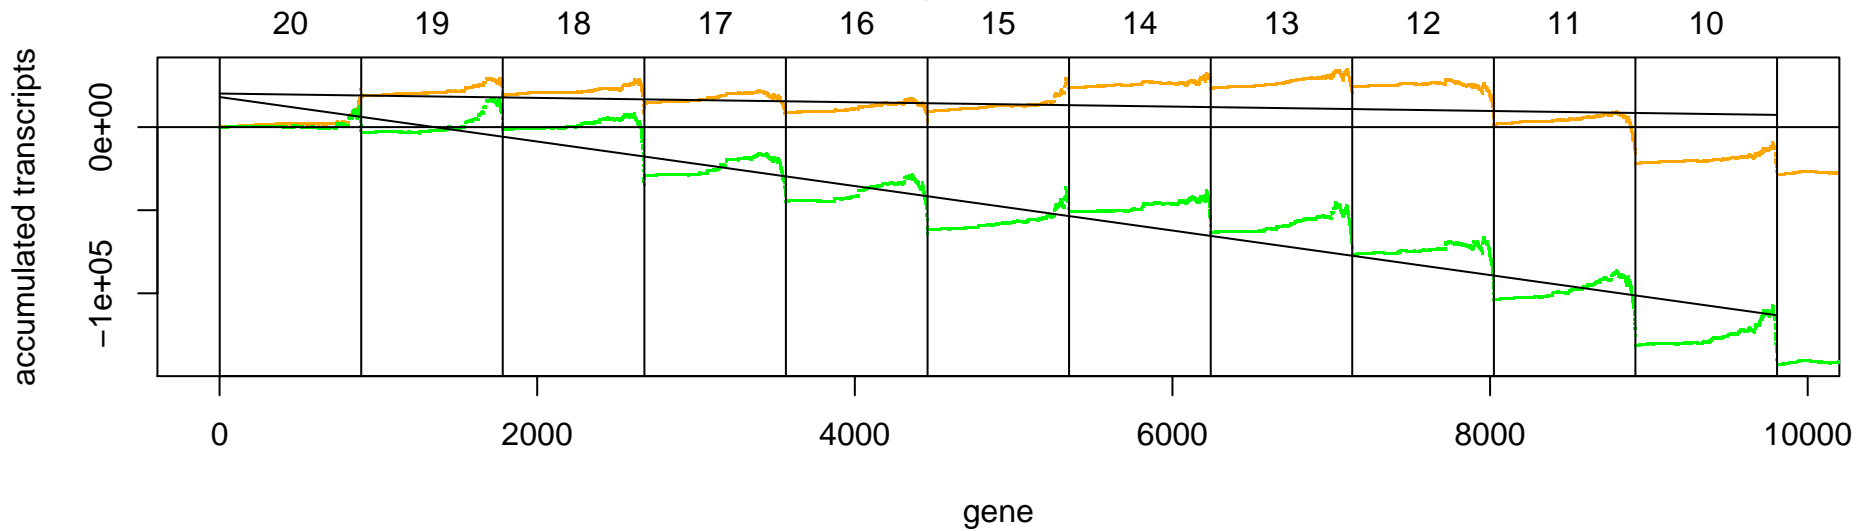



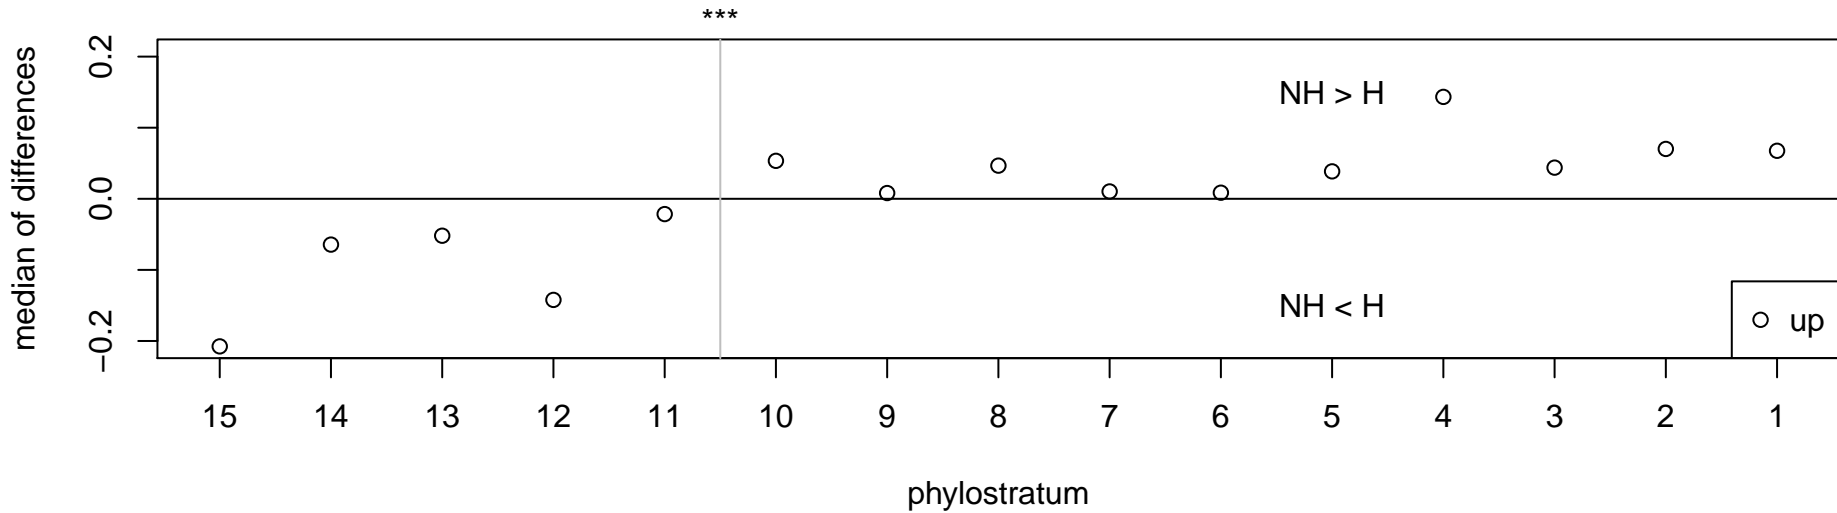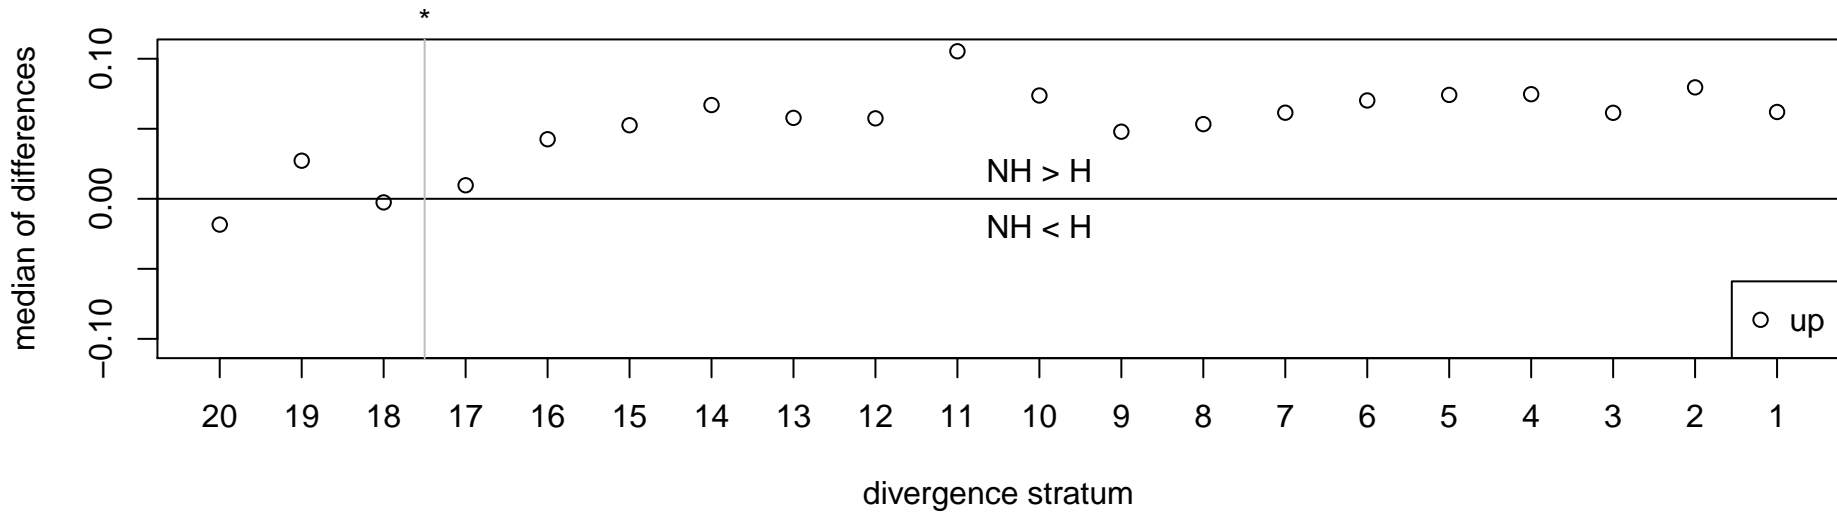

**a**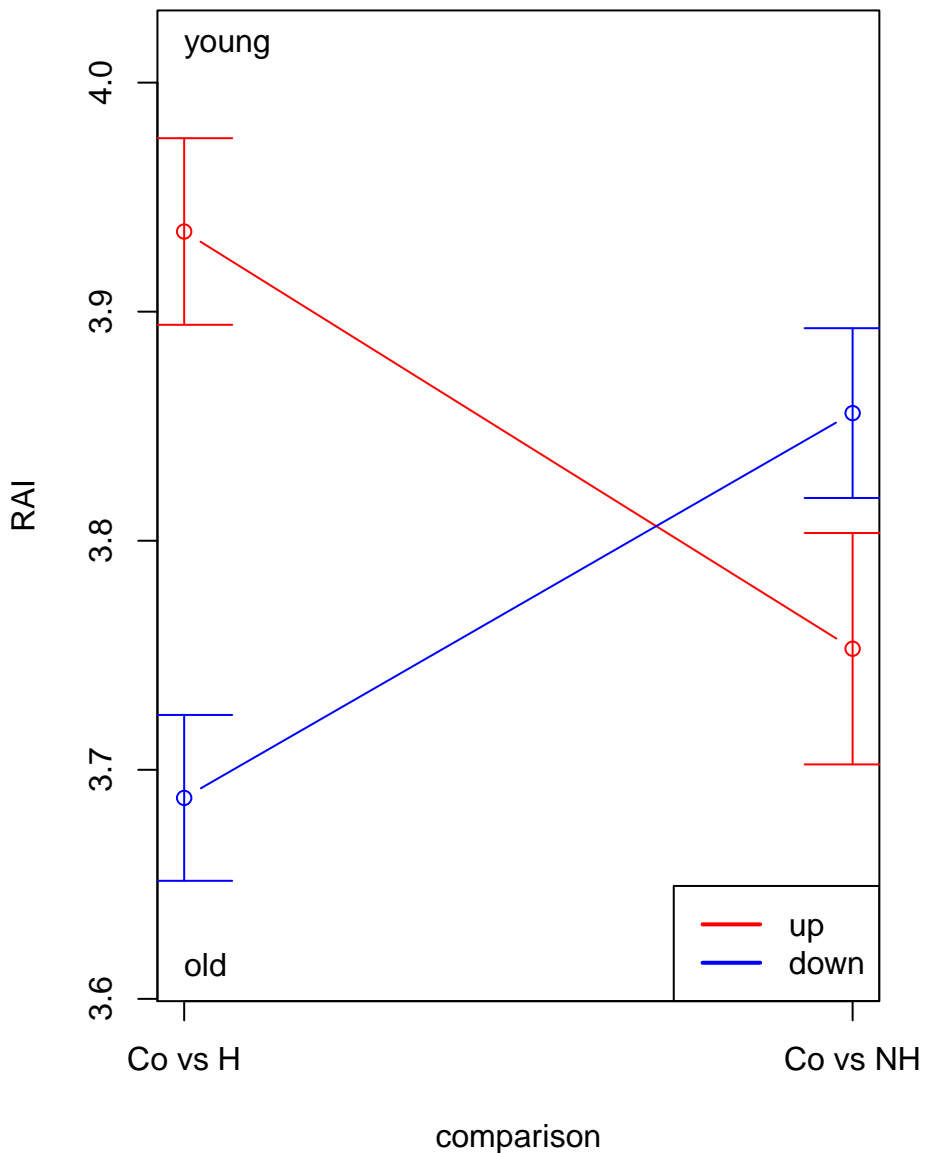**b**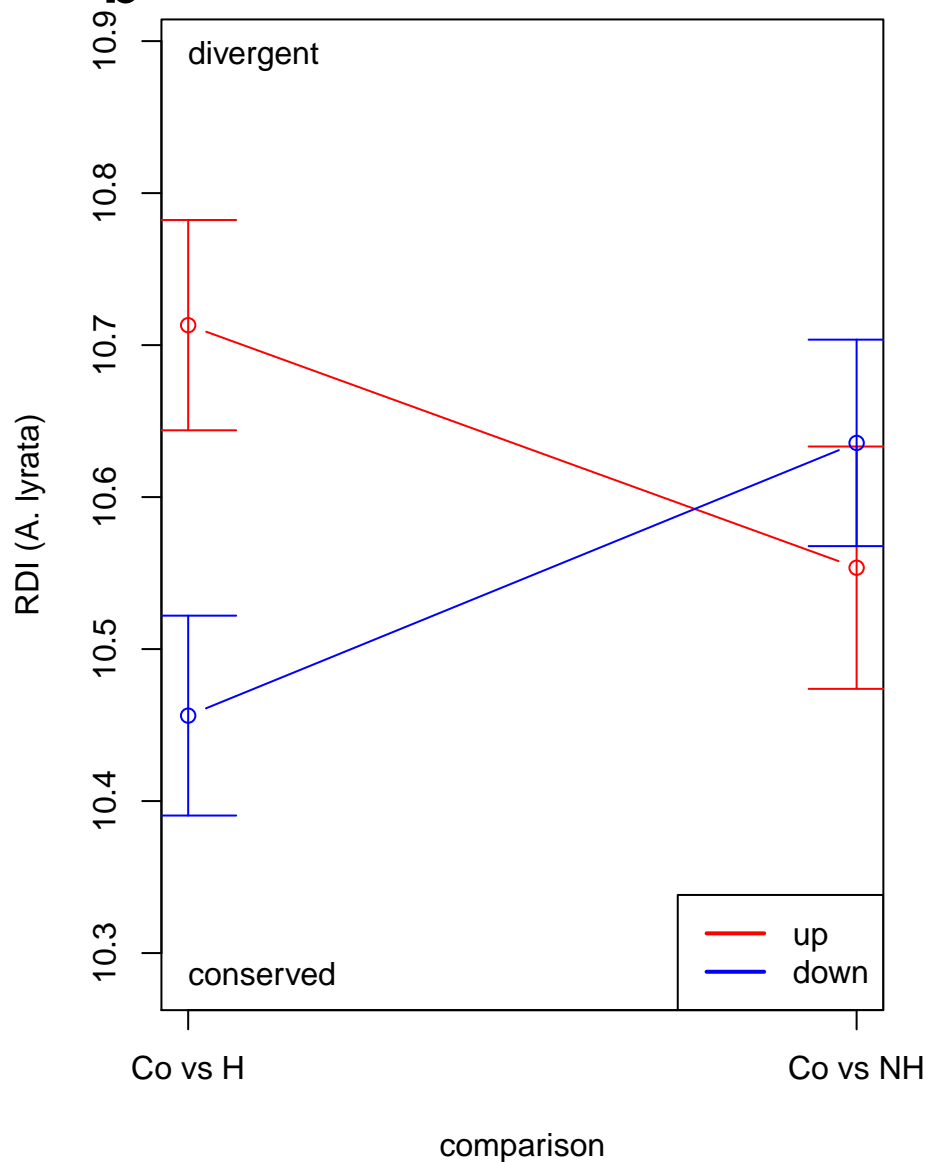

**a**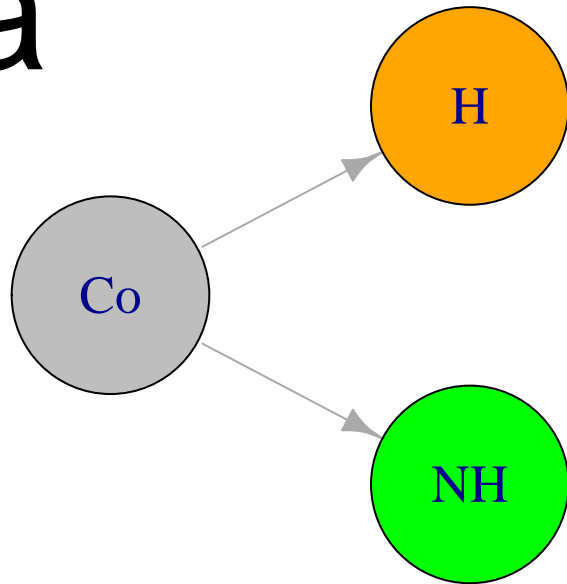**b**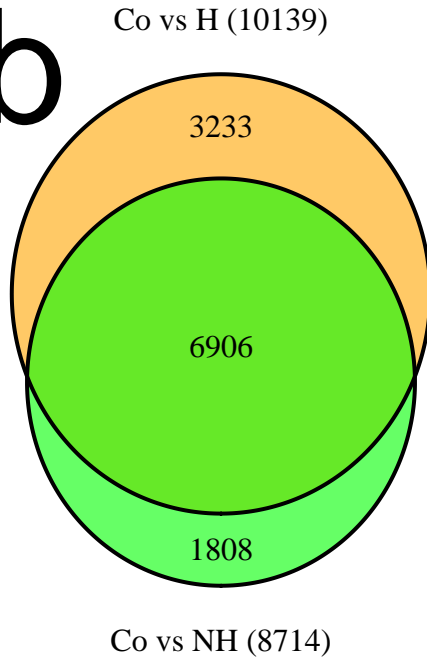**c**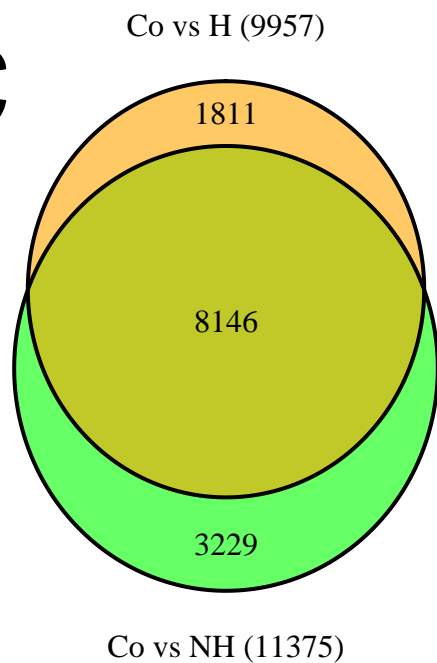

Source: http://biorxiv.org/content/10.1101/126045v1.full.pdf
